# Supplementary material for: Validation and recalibration of the Framingham cardiovascular disease risk models in an Australian Indigenous cohort
Source: PubMed Central journal article supplement — Eur J Prev Cardiol. 2017 Jul 27;24(15):1660–9. doi: 10.1177/2047487317722913 (PMC5648047; doi:10.1177/2047487317722913), 2017-07-27
Supplement: CPR722913_Suppl_Mat.pdf [file CPR722913_Suppl_Mat.pdf]

# Supplemental materials:

## 1. Information collected in the Well Person's Health Check (WPHC)

The WPHC was a cross-sectional survey conducted in 26 rural and remote Indigenous communities in the Bowen, Cairns, Cape York, Torres Strait and Mount Isa Health Service Districts in north Queensland between March 1998 and December 2000. The information collected in the WPHC screening including:

Demography: Participants provided their full name, date of birth, residential address, and self-identified as Indigenous or non-Indigenous.

Anthropometry: Participants were weighted and measured for height, waist and hip circumference.

Blood pressure: Blood pressure was measured using a Dinamap model 800 automated blood pressure monitor. Three separate measurements were recorded over approximately a 10-minute period.

Interview questions: Participants were assisted to recall food eaten in the 24 hours prior to the screen, and the number of serves of fruit and vegetables was recorded. Physical activity was measured using a seven day recall method. Participants were asked if they had diabetes diagnosed by a doctor, chronic heart, lung or kidney conditions, and the year in which these conditions were diagnosed. All participants were asked if they were taking vitamin supplements, any medication and whether they had symptoms indicative STI. Tobacco smoking and alcohol consumption information were asked.

Specimen collection and analysis: Fasting venous blood samples were collected. The following biochemical measurements were made: triglycerides, total cholesterol, high density lipoprotein C, low density lipoprotein, gamma-glutamyl transferase, red cell folate, fasting glucose and rapid plasma regain. Participants were asked to provide urine sample. A range of testing were conducted using the sample, including protein, PH, leucocytes, albumin creatinine ration, etc.

More information about the WPHC could be found in the paper:

Leonard D, McDermott R, Miller G, Muller R, McCulloch B, Arabena K. The Well Person's Health Check: a population screening program in indigenous communities in north Queensland. Australian Health Review. 2002;25(6):136.

## 2. ICD and procedure codes used to identify CVD events\*—

- **CHD, including**

MI

angina pectoris

coronary insufficiency

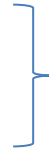

icd9: 4100-4149 (except 4110)  
icd10: I200-I259 (except I241)

CHD death → death of cause

- **Stroke** →

icd9: 4330-4359, 4370  
icd10: G450-G468 (except G454)  
I600-I672 (except I620-I629, I671)

- **Congestive heart failure** →

icd9: 4280-4289  
icd10: I500-I509  
I110, I130, I132

- **Peripheral vascular disease** →

icd9: 4400-4417 (except 4412, 4414, 4416)  
4439, 4440-4449  
icd10: I700-I718 (except I712, I714, I716)  
I739-I749

Procedure codes for CVD →

icd9: 3600-3699  
icd10: 3270000-3271801, 3273000-3275701, 3276300-3276303,  
3276305- 3276314, 3276316-3276319, 3305000-3305500, 3307500-3310000,  
3311200 -3313000, 3315100-3316300, 3317800-3355400, 3530306-3530501,  
3530906 -3531501, 3845619, 3849700-3850900, 3863700, 9020100-9020103  
9022900-9023000

\*ICD 9 codes were used for diagnosis in 1998 and part of diagnosis in 1999 in the dataset, so we have used both ICD version 9 and 10 to identify CVD events.

### 3. An example of using the recalibrated 2008 Framingham CVD model

Table A Regression coefficients in the Framingham study

|                            | Women    | Men      |
|----------------------------|----------|----------|
| Log of age                 | 2.32888  | 3.06117  |
| Log of total cholesterol   | 1.20904  | 1.12370  |
| Log of HDL                 | -0.70833 | -0.93263 |
| Log of SBP if not treated* | 2.76157  | 1.93303  |
| Log of SBP if treated      | 2.82263  | 1.99881  |
| Smoking                    | 0.52873  | 0.65451  |
| Diabetes                   | 0.69154  | 0.57367  |

\*High blood pressure treated rate in the Framingham cohort is 0.1176 and 0.1013 for women and men respectively

For a 50-year-old Indigenous woman who is not treated for high blood pressure, with total cholesterol of 4.65 mmol/L (180 mg/dL), HDL of 1.16 mmol/L (45 mg/dL), systolic blood pressure of 140 mm Hg, who is a current smoker and has no diabetes, the calculation of 5-year absolute CVD risk based on the recalibrated 2008 Framingham equation is:

$$\sum \beta_i X_i = 2.32888 * \log(50) + 1.20904 * \log(180) - 0.70833 * \log(45) + 2.76157 * \log(140) + 2.82263 * 0 + 0.52873 * 1 + 0.69154 * 0 = 26.8682$$

$$\sum \beta_i M_i = 2.32888 * \log(45.2) + 1.20904 * \log(194.0) - 0.70833 * \log(44.0) + 2.76157 * \log(133.0) * (1 - 0.1176) + 2.82263 * \log(133.0) * 0.1176 + 0.52873 * 0.471 + 0.69154 * 0.250 = 26.5263$$

$$P = 1 - 0.931^{\exp(26.8682 - 26.5263)} \approx 9.6\%$$

#### 4. Flow chart of the sample selection process and final sample used to validate and recalibrate the Framingham models

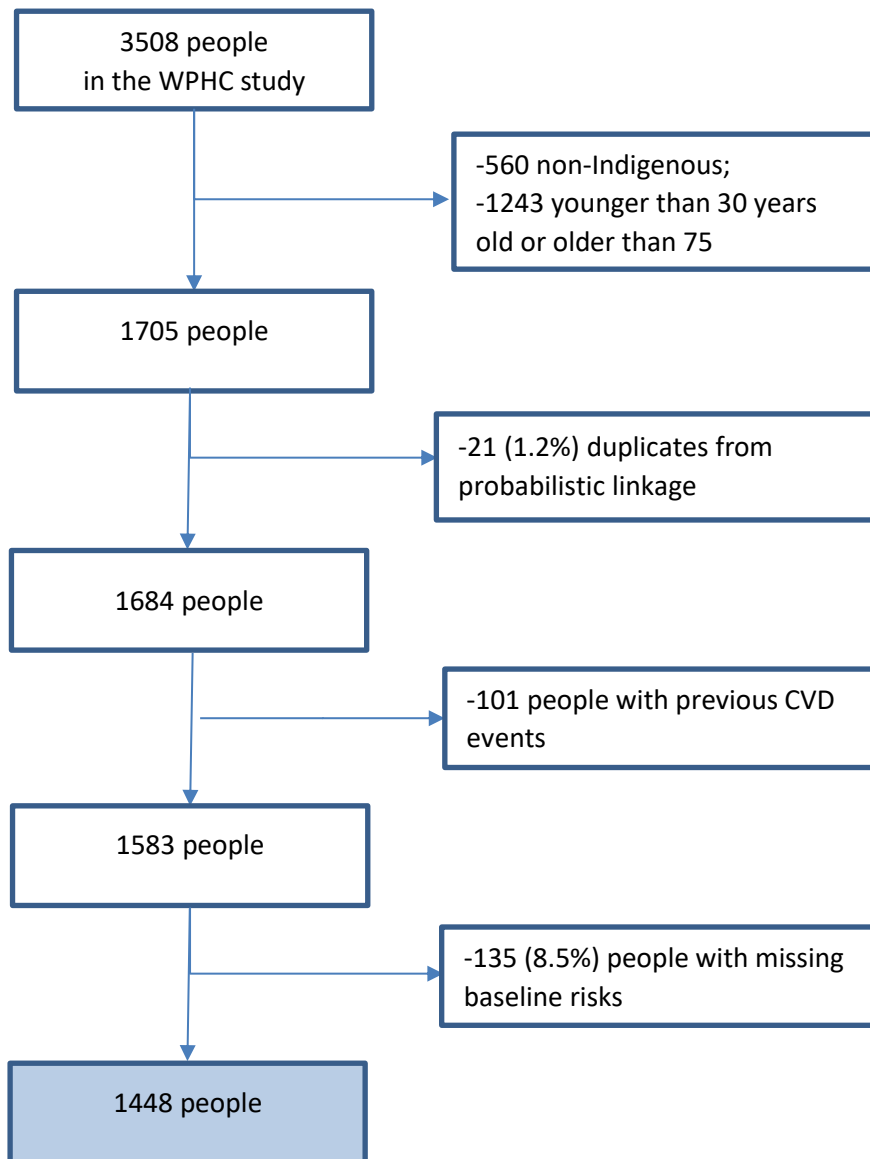

## 5. Sensitivity analysis on the probability of CVD events

### ECG-LVH:

The prevalence of ECG-LVH is 1% in the Framingham cohort. If we presume the prevalence in our sample is 10 times greater than in the Framingham cohort, the Framingham 1991 model predicted 5-year and 10-year CVD risk would be 7.1% (95% CI: 6.7-7.5) and 14.8% (95% CI: 14.1-15.4) respectively. This is slightly higher compared to the results in main results (6.8% and 14.2%) but still significantly underestimated compared to the observed probability of CVD in the WHPC cohort.

### Hypertension treatment:

The prevalence of hypertension treatment is 11.76% for women and 10.13% for men in the Framingham cohort. If we presume all people in our cohort were treated for hypertension, the Framingham 2008 model predicted 10-year CVD risk would be 12.1% (95% CI: 11.4-12.7), which is similar to the result in main text (12.0%) and still significantly underestimated compared to the observed probability of CVD in the WHPC cohort.

### Multiple imputation:

Results with multiple imputation are similar to the ones in the main text:

Table B 5-year and 10-year probability of CVD events in the WHPC indigenous sample, with multiple imputation

|                     | Sample size, n | Observed probability, % (95% CI) | Predicted probability, % (95% CI) |                  |                              |
|---------------------|----------------|----------------------------------|-----------------------------------|------------------|------------------------------|
|                     |                |                                  | Framingham 1991                   | Framingham 2008  | Recalibrated Framingham 2008 |
| <b>5-year risk</b>  |                |                                  |                                   |                  |                              |
| Total               | 1583           | 9.4 (8.0-11.0)                   | 6.7 (6.4-7.1)                     | NA*              | 10.4 (9.9-10.9)              |
| Gender              |                |                                  |                                   |                  |                              |
| Female              | 822            | 8.7 (7.0-10.9)                   | 5.7 (5.2-6.1)                     | NA*              | 9.6 (8.9-10.3)               |
| Male                | 761            | 10.1 (8.1-12.5)                  | 7.8 (7.3-8.4)                     | NA*              | 11.3 (10.5-12.1)             |
| Age group           |                |                                  |                                   |                  |                              |
| 30-34               | 327            | 3.2 (1.8-5.9)                    | 1.3 (1.8-5.9)                     | NA*              | 2.9 (2.7-3.1)                |
| 35-44               | 541            | 3.7 (2.4-5.8)                    | 3.7 (3.4-4.0)                     | NA*              | 6.2 (5.8-6.6)                |
| 45-54               | 377            | 13.0 (9.9-16.9)                  | 7.9 (7.3-8.5)                     | NA*              | 11.8 (11.1-12.6)             |
| 55-74               | 338            | 20.3 (16.3-25.1)                 | 15.4 (14.5-16.4)                  | NA*              | 22.9 (21.4-24.3)             |
| <b>10-year risk</b> |                |                                  |                                   |                  |                              |
| Total               | 1583           | 17.7 (15.8-19.8)                 | 14.0 (13.4-14.7)                  | 11.9 (11.3-12.5) | 21.2 (20.3-22.1)             |
| Gender              |                |                                  |                                   |                  |                              |
| Female              | 822            | 16.7 (14.1-19.6)                 | 12.1 (11.3-12.9)                  | 8.8 (8.2-9.5)    | 19.6 (18.4-20.8)             |
| Male                | 761            | 18.9 (16.1-22.0)                 | 16.1 (15.1-17.1)                  | 15.2 (14.2-16.2) | 22.9 (21.6-24.3)             |
| Age group           |                |                                  |                                   |                  |                              |
| 30-34               | 327            | 7.8 (5.2-11.7)                   | 3.6 (3.2-4.0)                     | 3.3 (3.1-3.6)    | 6.6 (6.1-7.1)                |
| 35-44               | 541            | 11.3 (8.7-14.6)                  | 8.7 (8.2-9.3)                     | 7.2 (6.7-7.7)    | 13.6 (12.8-14.4)             |
| 45-54               | 377            | 23.7 (19.5-28.6)                 | 17.0 (16.0-17.9)                  | 13.9 (12.9-14.8) | 24.9 (23.5-26.3)             |
| 55-74               | 338            | 30.9 (26.0-36.4)                 | 29.4(27.9-30.8)                   | 25.5 (23.8-27.2) | 43.3 (41.2-45.4)             |

## 6. Recalibrated 5-year risk scores under different HDL levels

Using the recalibrated 2008 Framingham CVD model, the 5-year CVD risk of an “average” male or female (with risk factors equal to those reported in table 1, total cholesterol 5 times of HDL level) can be found in table C.

Table C Recalibrated risk score of an average person using different HDL levels

| HDL, mg/dL | Risk score for females | Difference from HDL of 45 mg/dL, females | Risk score for males | Difference from HDL of 45 mg/dL, males |
|------------|------------------------|------------------------------------------|----------------------|----------------------------------------|
| 20         | 6.2%                   | -2.9%                                    | 7.3%                 | -1.2%                                  |
| 25         | 6.9%                   | -2.2%                                    | 7.7%                 | -0.8%                                  |
| 30         | 7.5%                   | -1.6%                                    | 7.9%                 | -0.6%                                  |
| 35         | 8.1%                   | -1.0%                                    | 8.1%                 | -0.4%                                  |
| 40         | 8.6%                   | -0.5%                                    | 8.3%                 | -0.2%                                  |
| 45         | 9.1%                   | 0.0%                                     | 8.5%                 | 0.0%                                   |
| 50         | 9.6%                   | 0.5%                                     | 8.7%                 | 0.2%                                   |
| 55         | 10.0%                  | 0.9%                                     | 8.8%                 | 0.3%                                   |
| 60         | 10.4%                  | 1.3%                                     | 9.0%                 | 0.5%                                   |
| 65         | 10.8%                  | 1.7%                                     | 9.1%                 | 0.6%                                   |
| 70         | 11.2%                  | 2.1%                                     | 9.2%                 | 0.7%                                   |

We used the fixed HDL level of 45 mg/dL (1.2mmol/L) to build the Indigenous CVD chart. By varying HDL levels by  $\pm 25$  mg/dL (0.6 mmol/L), the change in risk score ranged from -2.9% to 2.1%, and -1.2% to 0.7% for females and males respectively, which would have a minimal impact on the risk classifications for the chart.
